# Supplementary material for: Reduction chemical reaction synthesized scalable 3D porous silicon/carbon hybrid architectures as anode materials for lithium ion batteries with enhanced electrochemical performance
Source: Royal Society of Chemistry journal article supplement (doi:10.1039/c5ra05342k), 2015-01-01
Supplement: c5ra05342k1.pdf [file c5ra05342k1.pdf]

## Supplementary Information

**Reduction chemical reaction synthesized scalable 3D porous silicon/carbon hybrid architectures as anode materials for lithium ion battery with enhanced electrochemical performance**

Qun Li, and Longwei Yin\*, Xueping Gao\*

<sup>a</sup> Key Laboratory for Liquid-Solid Structural Evolution and Processing of Materials, Ministry of Education, School of Materials Science and Engineering, Shandong University, Jinan 250061, P. R. China

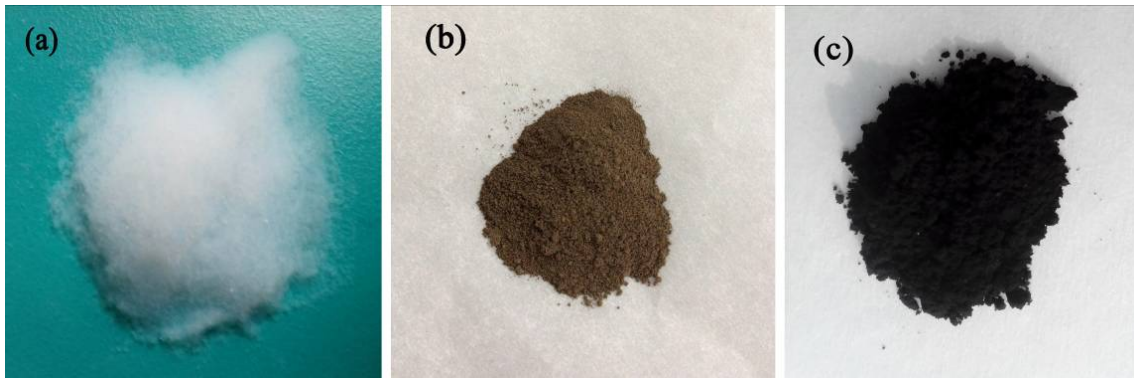

**Fig. S1.** Optical images of the synthesized samples, (a) SiO<sub>2</sub> aerogel, (b) porous Si, and (c) porous Si/C hybrids.

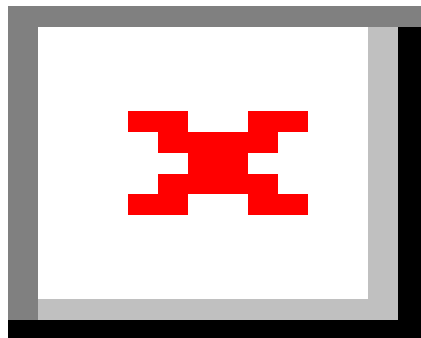

**Fig. S2.** FE-SEM images of the silica aerogels.

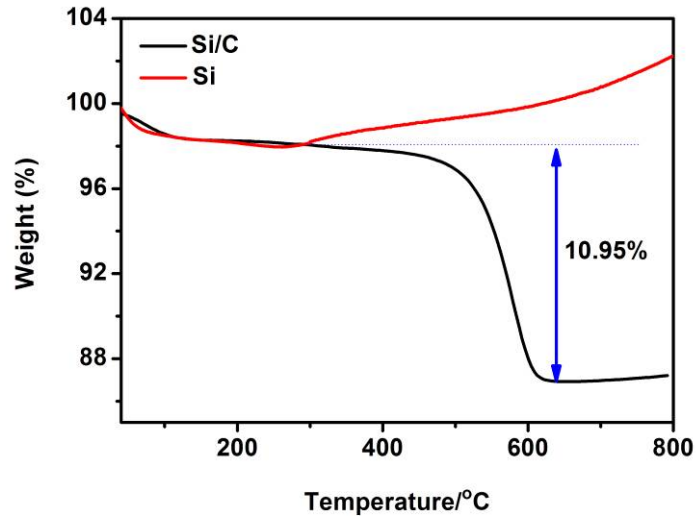

Fig. S3. TGA curves of the porous Si/C hybrids under air at a rate of  $10\text{ }^{\circ}\text{C min}^{-1}$  from 40 to 800  $^{\circ}\text{C}$ .

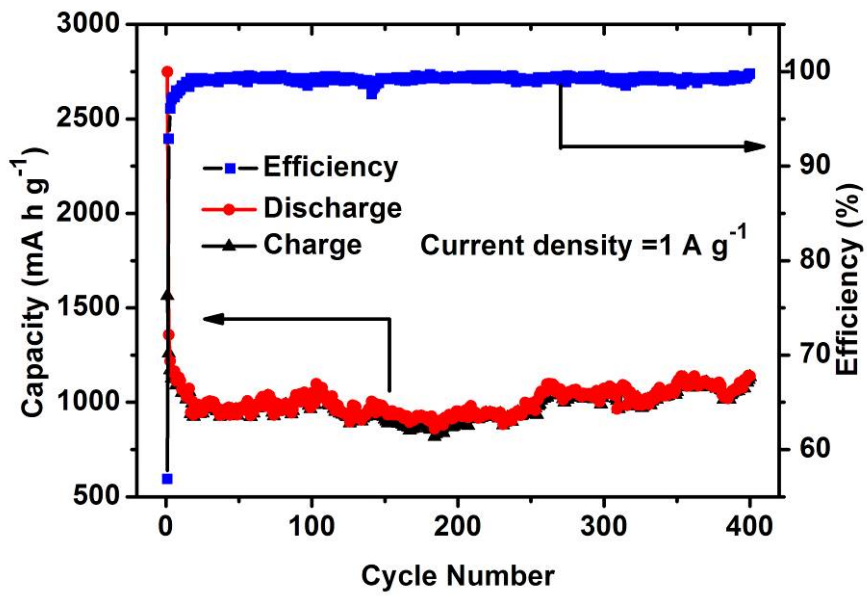

Fig S4. Long cycle performance of the Si/C hybrid material
